# Supplementary material
Source: MDPI journal article supplement (https://www.mdpi.com/2311-5637/7/4/309)
Supplement: s1 [file s1 › fermentation-1461372-supplementary.pdf]

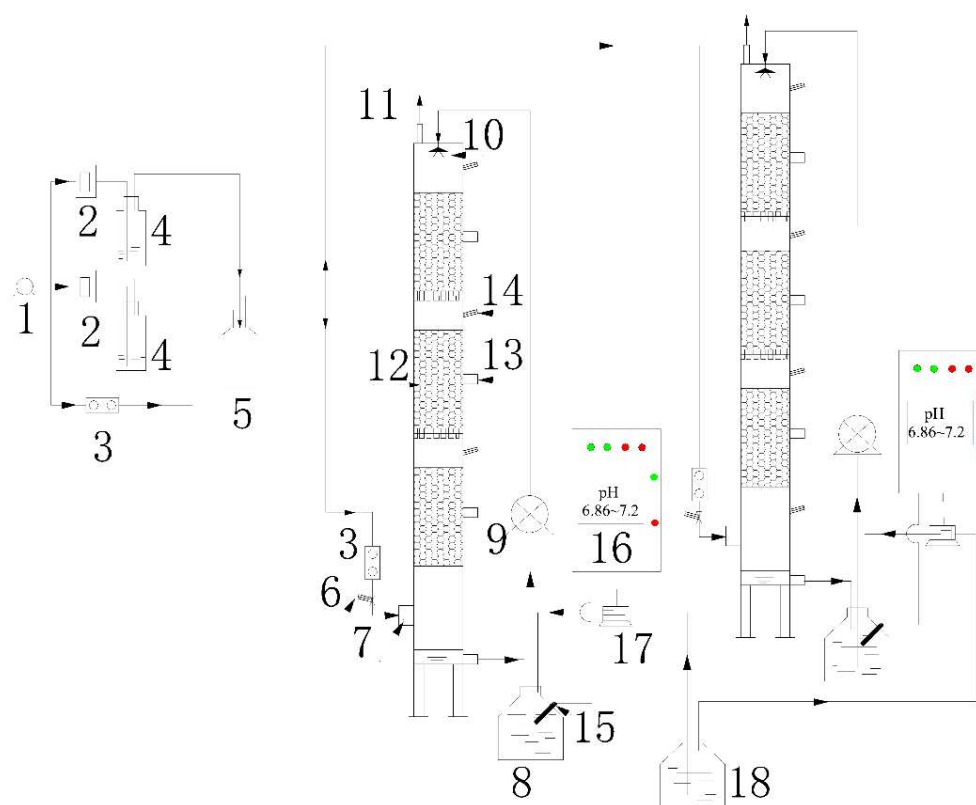

**Figure S1.** The schematic of the multi-layer BTF. (1) Air pump, (2,3) Rotor meter, (4) Sample flask, (5) Mixture flask, (6) air inlet, (7) sampling port, (8) Nutrition flask, (9) packing port, (10) spray header, (11) air outlet, (12) packing material, (13) packing material sampling port, (14) air sampling port, (15) pH detector, (16) Auto-pH adjuster, (17) control panel, (18) NaOH solution flask.

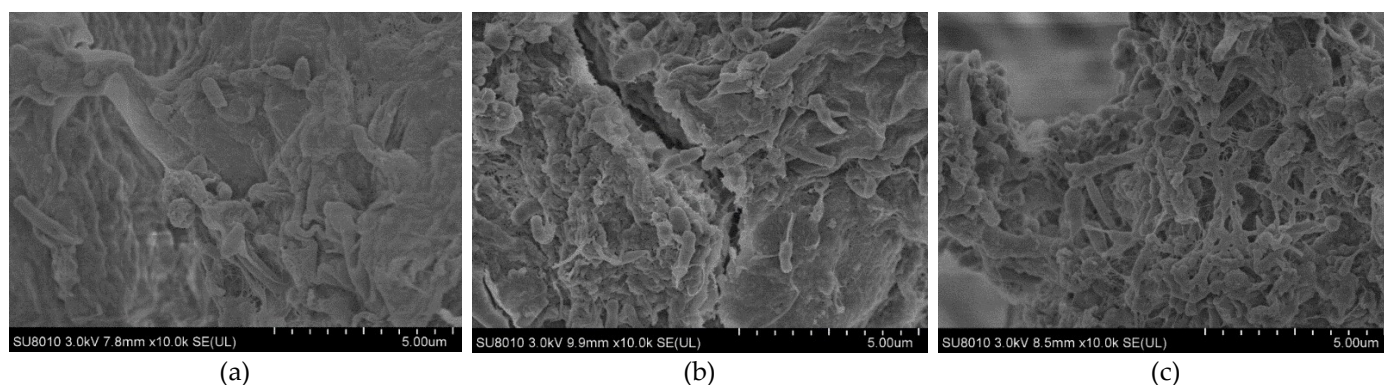

**Figure S2.** FESEM microphotographs of the packing material (a); sample of the biofilter on day 20 during startup period (b) sample on day 77 during operational period (c) sample on day 240 during end period.

**Table S1.** Operation condition of BTF treatment.

| Phase | Time, days | EBRT, s | Inlet conc. mg·m <sup>-3</sup> | Flow rate, m <sup>3</sup> ·h <sup>-1</sup> | Inlet loading rate, g·m <sup>-3</sup> ·h <sup>-1</sup> |
|-------|------------|---------|--------------------------------|--------------------------------------------|--------------------------------------------------------|
| 0     | 0-22       | 56      | 196-287                        | 0.2                                        | 11-16                                                  |
| I     | 23-39      | 56      | 198-1161                       | 0.2                                        | 11-66                                                  |
| II    | 40-56      | 28      | 262-1032                       | 0.4                                        | 30-118                                                 |
| III   | 57-77      | 20      | 260-1529                       | 0.6                                        | 45-262                                                 |

**Text 1 Strain isolation of *Pseudomonas putida* S-1**

The activated sludge used as microbial source was obtained from a pharmaceutical factory in Zhejiang, China. The sample was incubated in MMP to enrich potential PT-degrading bacteria. After the microbes were acclimatized with 10–50 mg/L liquid-phase PT for approximately 2 months, 1 mL of sludge samples was introduced to 50 mL of MMP containing 28 mg/L of liquid-phase PT as a sole carbon and energy source; the resulting mixture was incubated at 30 °C and 160 rpm for 3 days. Afterward, 1.0 mL of the culture was transferred to the same fresh medium and incubated under the same conditions. The same procedure was repeated five times, and the microbial suspensions were purified on R2A solid medium by applying conventional spread plate techniques. The obtained pure bacterial strains were kept at 4 °C for further use.

**Table S2.** Comparison CO<sub>2</sub> production of recent results of removal single or mixed pollutants with present study.

| Pollutant                                             | Bioprocess    | Maximum EC (g·m <sup>-3</sup> ·h <sup>-1</sup> ) | P CO <sub>2</sub> Coefficient | Ref.          |
|-------------------------------------------------------|---------------|--------------------------------------------------|-------------------------------|---------------|
| Single                                                |               |                                                  |                               |               |
| DMS                                                   | Biofilter     | /                                                | 0.22                          | [27]          |
| Propanethiol                                          | Biofilm       | /                                                | 1.23                          | [2]           |
| Toluene                                               | Biofilter     | 40.3                                             | 2.41                          | [40]          |
| Toluene                                               | Biofilter     | 1280                                             | 1.77                          | [29]          |
| Toluene                                               | Biofiltration | 140                                              | 2.59                          | [26]          |
| Toluene                                               | Biofiltration | 80                                               | 2.5                           | [28]          |
| Mixture                                               |               |                                                  |                               |               |
| DMS+CS <sub>2</sub> +H <sub>2</sub> S+CO <sub>2</sub> | Biofilters    | /                                                | 0.344                         | [55]          |
| Toluene +Ethyl Acetate                                | Biofilter     | 150                                              | 3.06                          | [56]          |
| Toluene + methanol                                    | BTF           | 55                                               | 1.60                          | [57]          |
| Toluene +p-xylene                                     | Biofilters    | 32.4                                             | 2.60                          | [40]          |
| DMS 56 s                                              | BTF           | 45.90                                            | 2.26                          | In this study |
| Propanethiol 56 s                                     | BTF           | 36.52                                            |                               | In this study |
| Toluene 56 s                                          | BTF           | 21.27                                            |                               | In this study |
| DMS 28 s                                              | BTF           | 50.60                                            | 1.88                          | In this study |
| Propanethiol 28                                       | BTF           | 39.02                                            |                               | In this study |
| Toluene 28 s                                          | BTF           | 51.28                                            |                               | In this study |
| DMS 20 s                                              | BTF           | 71.71                                            | 1.72                          | In this study |
| Propanethiol 20 s                                     | BTF           | 70.03                                            |                               | In this study |
| Toluene 20 s                                          | BTF           | 43.58                                            |                               | In this study |

**Table S3.** α-Diversity of each sample.

| Index         | Startup period | Operational period | End period |
|---------------|----------------|--------------------|------------|
| Shannon index | 5.03           | 4.58               | 4.076      |
| Simpson index | 0.027          | 0.067              | 0.11       |
| Chao 1        | 5044.37        | 4541.82            | 5905.2     |
| OTU           | 2599           | 2511               | 3070       |
